# Supplementary material
Source: publisher figshare collection journal article supplement (https://karger.figshare.com/ndownloader/files/15220319)

**Supplementary material**

**S1. Search strategy: The following strategy was used to search MEDLINE (PubMed):**

1. "Pulmonary Disease, Chronic Obstructive"[Mesh]

2. “COPD, Severe Early-Onset” [Supplementary Concept]

3. Pulmonary Emphysema [Mesh]

4. Emphysema [Mesh]

5. #1 OR #2 OR #3 OR #4

6. Bronchoscopy [Mesh]

7. Lung Volume Reduction [Non Mesh]

8. Reduction, Lung Volume [Non Mesh]

9. Volume Reduction, Lung [Non Mesh]

10. Endobronchial valve

11. #6 OR #7 OR #8 OR #9 OR#10

12. Randomized controlled trial [Publication Type]

13. #5 AND #11 AND #12

The MEDLINE strategy will be adapted to the syntax and subject headings of the other databases.

Supplementary Figure 1. Comparison 2. Subgroup analysis. Change in FEV1 after treatment according to Follow up


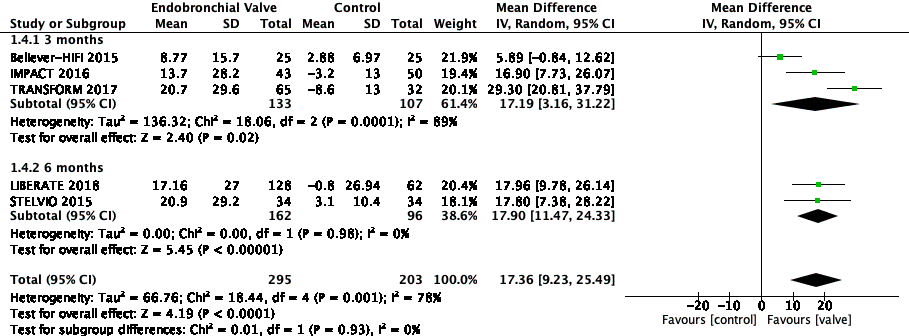


Supplementary Figure 2. Subgroup. Change in FEV1 according to type of control group


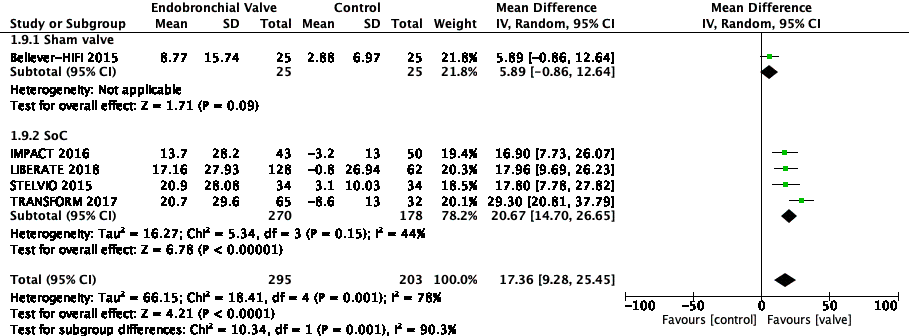


Supplementary figure 3. Relative risk of mortality after intervention

**
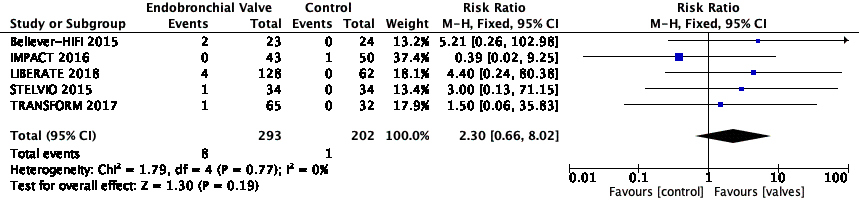
**

Supplementary figure 4. Subgroup analysis of pneumothorax according to emphysema distribution


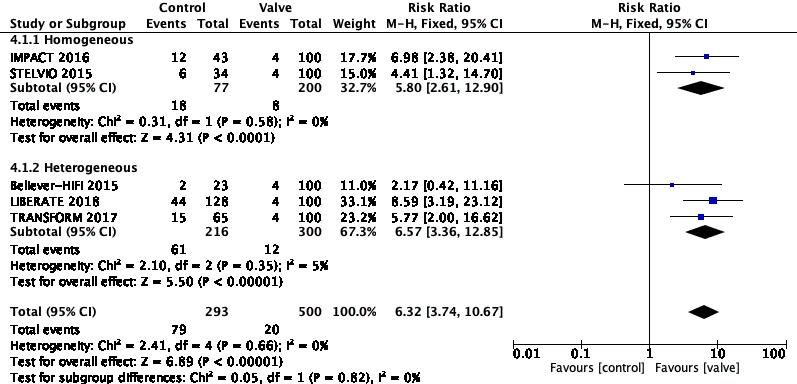


Supplementary figure 5. Funnel plot. Changes in FEV1

**
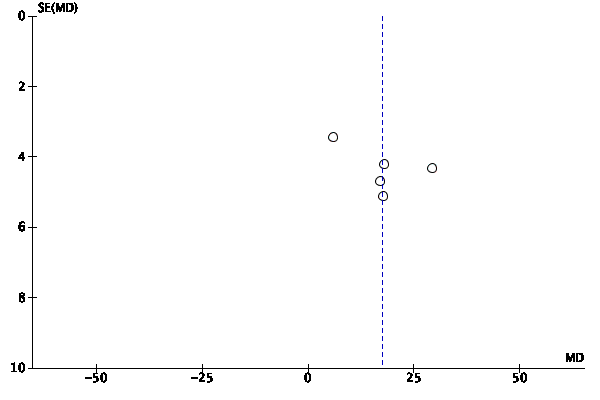
**

Supplementary figure 6. Funnel plot. Changes in SGRQ

**
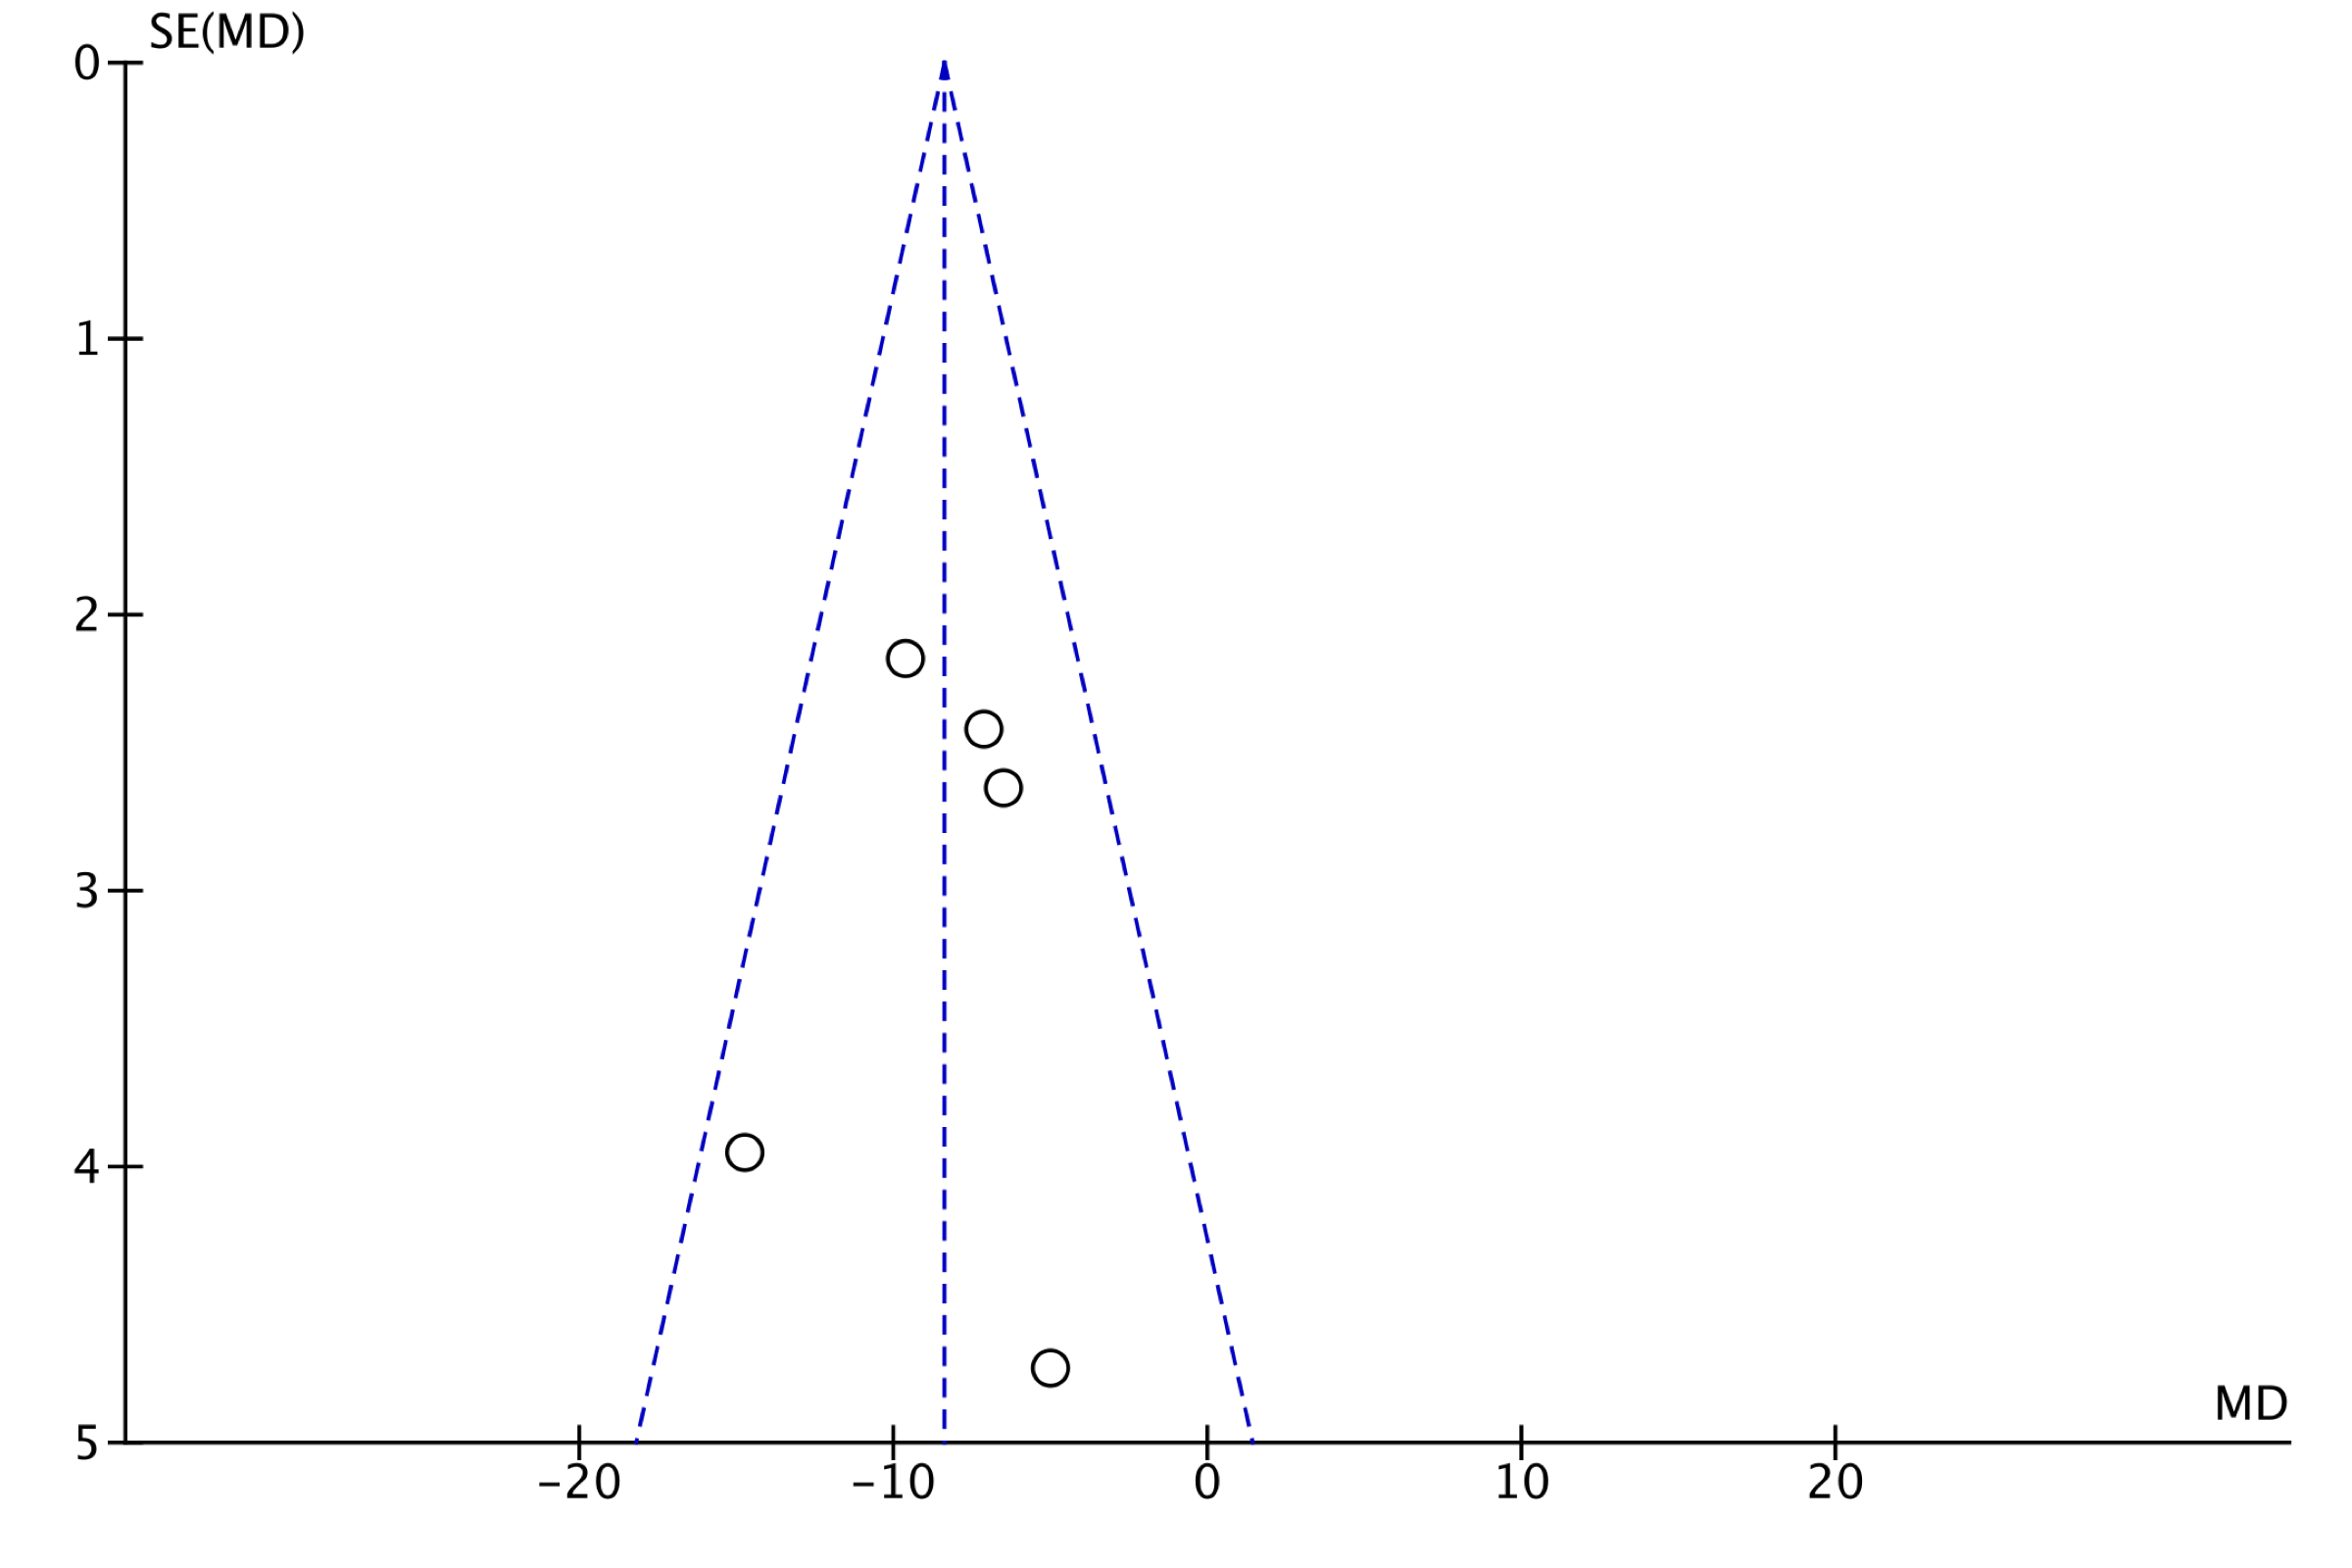
**

Supplementary figure 7. Funnel plot. Changes in 6MWT

**
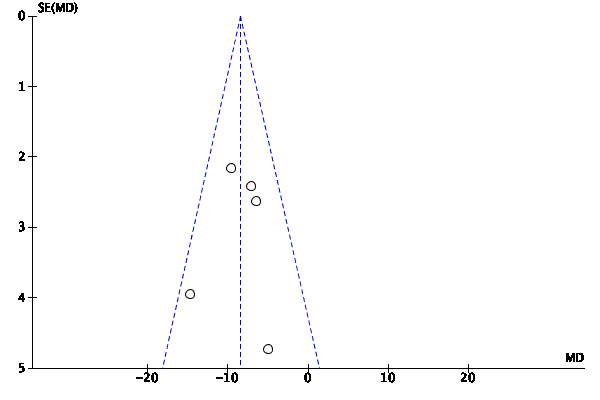
**

Supplementary figure 8. Funnel plot. Change in RV

**
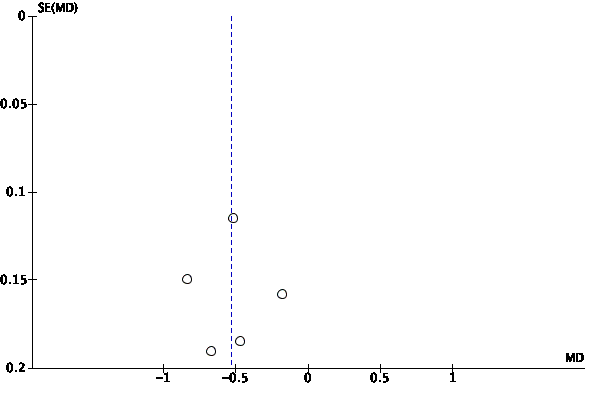
**

Supplementary figure 9. Funnel plot. Risk of mortality

**
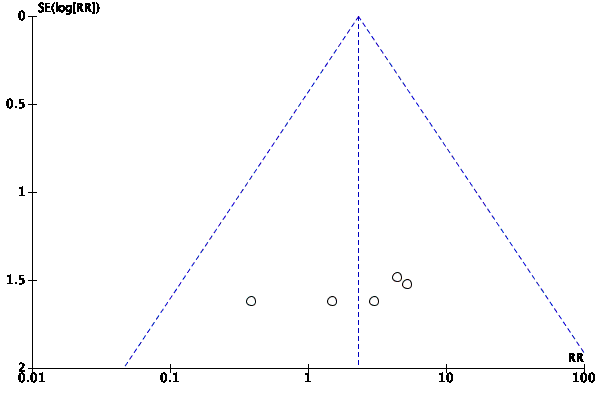
**

Supplementary figure 10. Funnel plot. Risk of pneumothorax


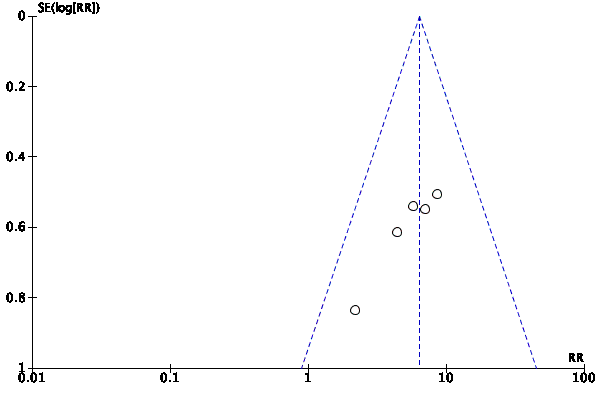

Supplement: Supplementary file 1 [file 15220319]
